# Supplementary material for: Supramolecular polymer networks from hybrid between graphene oxide and per-6-amino-β-cyclodextrin
Source: Royal Society of Chemistry journal article supplement (doi:10.1039/c0cc01644f), 2010-01-01
Supplement: c0cc01644f.pdf [file c0cc01644f.pdf]

## **Electronic Supplementary Information (ESI)**

### **Supramolecular Polymer Networks from Hybrid between Graphene Oxide and Per-6-Amino- $\beta$ -Cyclodextrin**

Tomoki Ogoshi\*, Yuto Ichihara, Tada-aki Yamagishi and Yoshiaki Nakamoto

*Graduate School of Natural Science and Technology, Kanazawa University,  
Kakuma-machi, Kanazawa 920-1192, Japan*

## **Table of Contents**

|                                                                   |    |
|-------------------------------------------------------------------|----|
| Experimental Section                                              | S2 |
| Figure S1. SEM images of <b>GO-PACD hybrid</b>                    | S3 |
| Figure S2. Size distributions of <b>GO-PACD hybrid</b> with AdCNa | S4 |
| Figure S3. SEM images of <b>GO-PACD hybrid</b> with Ad-Dimer      | S5 |

## **Experimental Section**

**Materials.** Graphite oxide (GO) was prepared from natural graphite flakes (325 mesh, Alfa-Aesar) by Hummer's method.<sup>1</sup> per-6-Amino- $\beta$ -cyclodextrin (PACD) was synthesized according to the previous literature.<sup>2</sup>

**Measurements.** The <sup>1</sup>H NMR spectra were recorded at 500 MHz with a JEOL-ECA 500 spectrometer. Fluorescence spectra were recorded on a Hitachi F-2500 fluorescence spectrometer at 25 °C. UV-Vis absorption spectra were recorded with a JASCO V-670 spectrophotometer at 25 °C. For fluorescence and UV-Vis measurements, one centimeter quartz cuvetts were used. Dynamic light scattering (DLS) measurements were carried out on Beckman Coulter N5 Submicron Particle Size Analyzer at 20 °C. The FT-IR spectra were obtained using a JASCO FT-IR460 plus infrared spectrometer.

**Synthesis of GO-PACD Hybrid.** GO (2 mg) was dissolved in aqueous solution (5 mL). To the mixture, PACD (0.001-0.5 eq. to GO) were added and stirred at 25 °C for 10 minutes.

## **References**

- 1) W. Hummers and R. Offeman, *J. Am. Chem. Soc.*, 1958, **80**, 1339.
- 2) P. R. Ashton, R. Königer and J. F. Stoddart, *J. Org. Chem.*, 1996, **61**, 903.

### **SEM Images of GO-PACD Hybrid**

**(a) PACD/GO = 0.001**

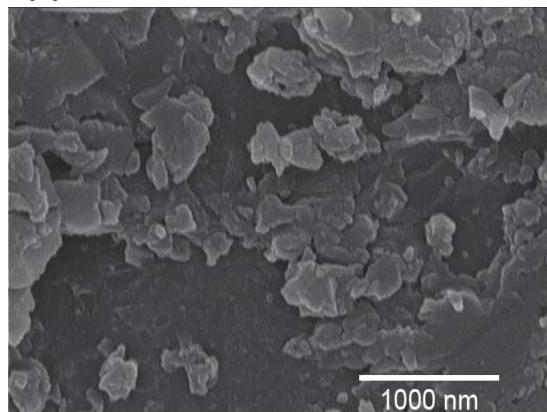

**(b) PACD/GO = 0.1**

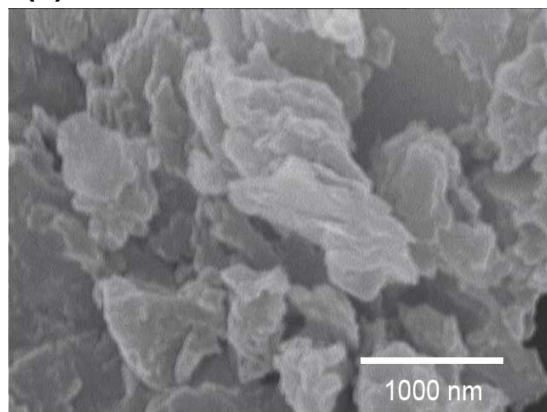

**(c) PACD/GO = 0.5**

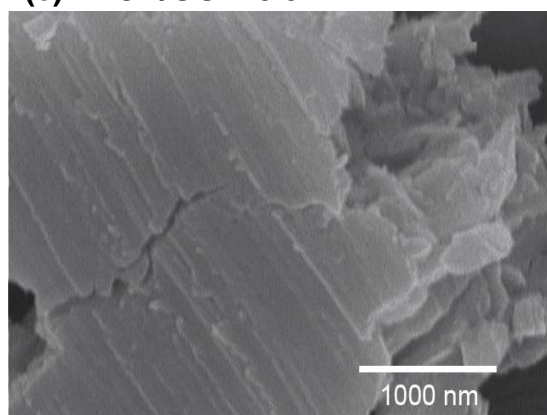

**Figure 1S.** SEM images of **GO-PACD hybrid** with PACD/GO weight ratios of (a) 0.001, (b) 0.1 and (c) 0.5. Large aggregates from GO sheets were observed with increasing of PACD/GO ratios, indicating that PACDs act as crosslinking agents between GO sheets.

### Size Distributions of GO-PACD Hybrid with AdCNa

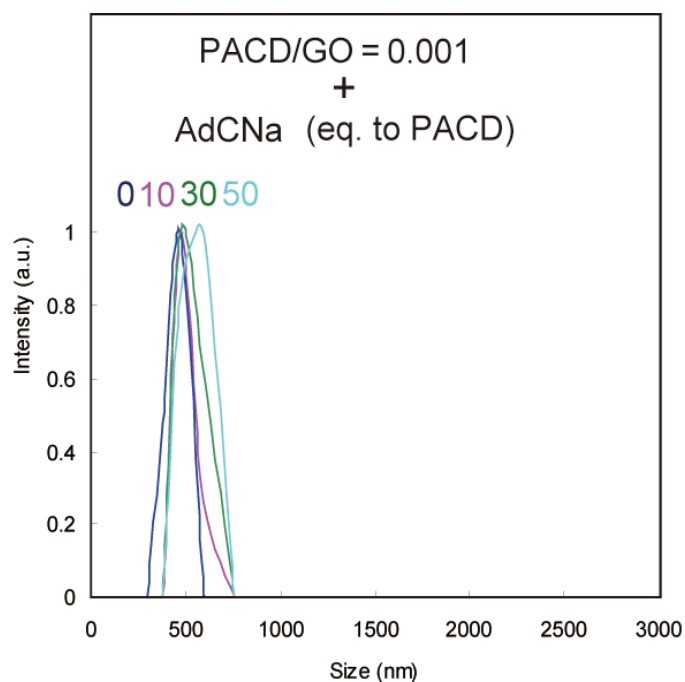

**Figure 2S.** Dynamic light scattering results indicating the colloidal size distributions of **GO-PACD hybrid** (PACD/GO = 0.001) upon addition of AdCNa (0 – 50 eq. to PACD). Addition of AdCNa to aqueous the GO-PACD hybrid solution gave no change in colloidal size.

### **SEM Images of GO-PACD Hybrid with Ad-Dimer**

**(a) GO-PACD hybrid (PACD/GO = 0.001) without Ad-Dimer**

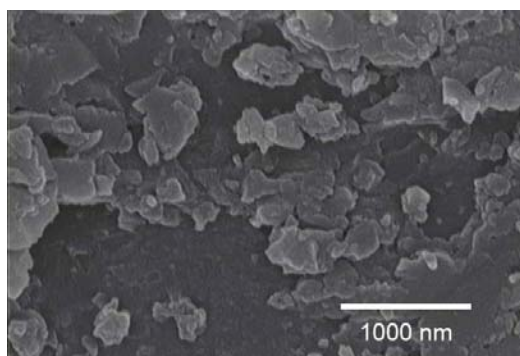

**(b) GO-PACD hybrid (PACD/GO = 0.001) with Ad-Dimer (5 eq. to PACD)**

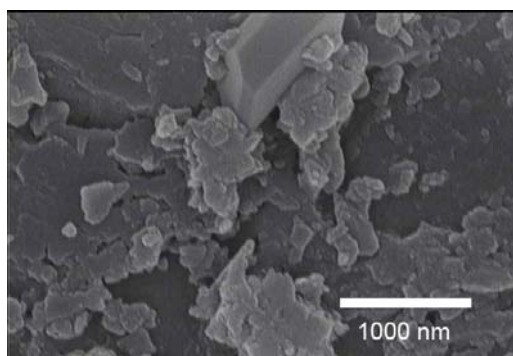

**(c) GO-PACD hybrid (PACD/GO = 0.001) with Ad-Dimer (15 eq. to PACD)**

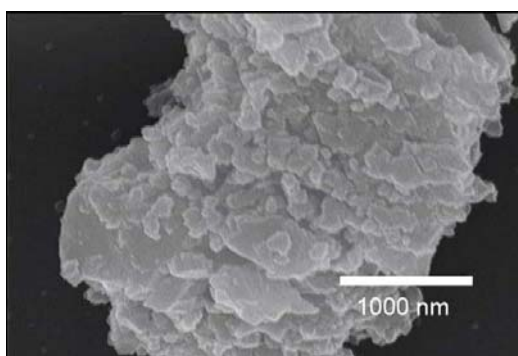

**(d) GO-PACD hybrid (PACD/GO = 0.001) with Ad-Dimer (25 eq. to PACD)**

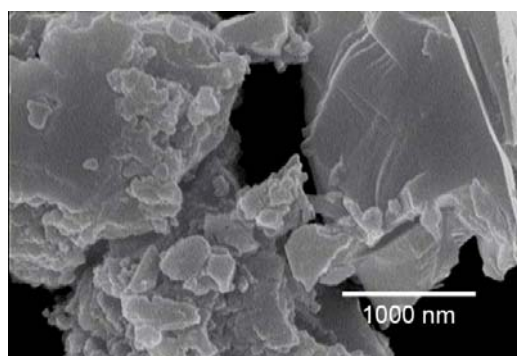

**Figure 3S.** SEM images of **GO-PACD hybrid** (PACD/GO = 0.001) (a) without Ad-Dimer and with (b) 5 eq., (c) 15 eq. and (d) 25 eq. of Ad-Dimer to PACD. Aggregates from GO sheets were observed upon addition of Ad-Dimer, indicating that Ad-Dimer acts as crosslinking agents between GO sheets.
